# Supplementary material
Source: PubMed Central journal article supplement (PMC3062439)
Supplement: NIHMS273926-supplement-1_si_001.pdf [file NIHMS273926-supplement-1_si_001.pdf]

## Supporting Information

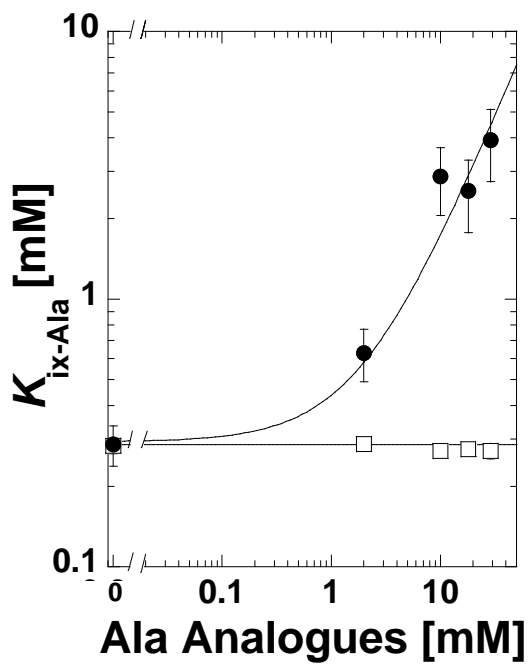

Figure S1. Examples of competitive binding, using the competitive binding of L-alanine methyl ester (●) to wild type hL-PYK. Not all *Ala* analogues that lack an allosteric response show competitive binding with *Ala* (e.g. butylamine, □).

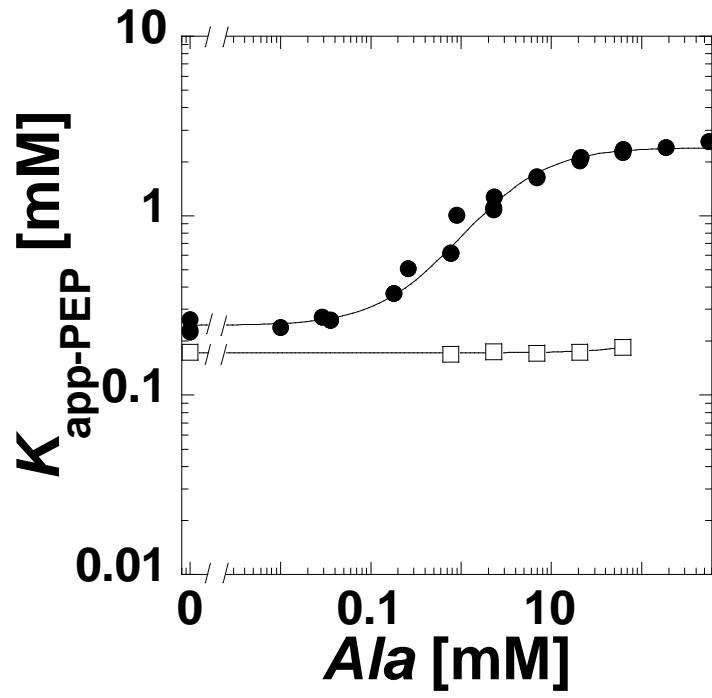

Figure S2. The response of hL-PYK wild type (●) and H476L (□) to 500mM *Ala*.

**Table S1: Fit Parameters for Amino Acids**

| Amino Acid                                                                                                           | $K_{ix}$ (mM)  | $Q_{ax}$                      |
|----------------------------------------------------------------------------------------------------------------------|----------------|-------------------------------|
| <i>Gly</i><br>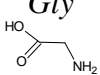                      | 23±2           | 0.26±0.01                     |
| <i>L-Ala</i><br>                    | 0.33±0.01      | 0.100±0.001                   |
| <i>L-Cys</i><br>                    | 0.101±0.003    | 0.124±0.002                   |
| <i>L-Ser</i><br>                    | 4.6±0.4        | 0.24±0.01                     |
| L-(+)-2,3-diaminopropionic acid<br> | 8±3            | 0.15±0.05                     |
| L-(+)-2-aminobutyric acid<br>      | 0.43±0.02      | 0.05±0.01                     |
| <i>L-Pro</i><br>                  | 1.40±0.04      | 0.06±0.001                    |
| <i>L-Val</i><br>                  | 7.6±0.4        | 0.09±0.004                    |
| <i>L-Thr</i><br>                  | 19.6±0.7       | 0.160±0.003                   |
| <i>L-Met</i><br>                  | 21±2           | 0.35±0.01                     |
| L-homoserine<br>                  | 10±4           | No Upper Plateau <sup>b</sup> |
| <i>L-Asn</i><br>                  | — <sup>a</sup> | — <sup>a</sup>                |
| <i>L-Asp</i><br>                  | — <sup>a</sup> | — <sup>a</sup>                |
| <i>L-Ile</i><br>                  | 31±8           | No Upper Plateau <sup>b</sup> |

|                                                                                     |         |                               |
|-------------------------------------------------------------------------------------|---------|-------------------------------|
| 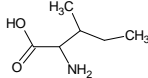   |         |                               |
| <b>L-Leu</b>                                                                        | ___ a   | ___ a                         |
|    |         |                               |
| <b>L-norvaline</b>                                                                  | 29±3    | No Upper Plateau <sup>b</sup> |
|    |         |                               |
| <b>L-Glu</b>                                                                        | ___ a   | ___ a                         |
|    |         |                               |
| <b>L-Gln</b>                                                                        | ___ a   | ___ a                         |
|    |         |                               |
| <b>L-norleucine</b>                                                                 | ___ a   | ___ a                         |
| <b>2-aminoheptanoic acid</b>                                                        | ___ a   | ___ a                         |
|    |         |                               |
| <b>2-aminocaprylic acid</b>                                                         | ___ a   | ___ a                         |
|    |         |                               |
| <b>L-His</b>                                                                        | ___ a   | ___ a                         |
|  |         |                               |
| <b>L-Arg</b>                                                                        | ___ a   | ___ a                         |
|  |         |                               |
| <b>L-Lys</b>                                                                        | ___ a   | ___ a                         |
|  |         |                               |
| <b>L-Phe</b>                                                                        | 3.9±0.3 | 0.39±0.01                     |
| <b>(S)-(+)-2-phenylglycine</b>                                                      | ___ a   | ___ a                         |
|  |         |                               |
| <b>4-nitro-L-phenylalanine</b>                                                      | ___ a   | ___ a                         |

L-homophenylalanine

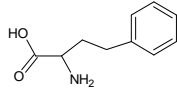

—<sup>a</sup>

—<sup>a</sup>

*L-Tyr*

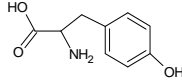

—<sup>a</sup>

—<sup>a</sup>

*O*-methyl-L-tyr

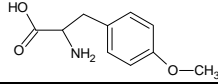

3.8±0.6

0.20±0.04

---

<sup>a</sup> $K_{a-PEP}$  was not responsive to the amino acid analogue within the working concentration defined in Materials and Methods.

<sup>b</sup>Although the amino acid analogue caused a reduction in PEP affinity, within the working concentration range the upper plateau was not obtained.

Table S2: Fit Parameters for Ala and Phe Analogues<sup>a</sup>

| Ala Analogues                                                                                                 | $K_{ix}$ (mM)  | $Q_{ax}$                      |
|---------------------------------------------------------------------------------------------------------------|----------------|-------------------------------|
| <i>L-Ala</i><br>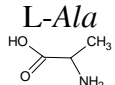             | 0.33±0.01      | 0.100±0.001                   |
| <i>D-Ala</i><br>             | 10±2           | 0.37±0.02                     |
| <i>N-methyl-L-ala</i><br>    | 1.1±0.2        | 0.16±0.01                     |
| 2-aminoisobutyric acid<br>   | 11±2           | 0.16±0.01                     |
| Propionic acid<br>           | — <sup>b</sup> | — <sup>b</sup>                |
| <i>N-formyl-L-ala</i><br>   | — <sup>b</sup> | — <sup>b</sup>                |
| <i>N-acetyl-L-ala</i><br>  | — <sup>b</sup> | — <sup>b</sup>                |
| Ethanolamine<br>           | 50±20          | No Upper Plateau <sup>c</sup> |
| Ethylamine<br>             | 40±10          | No Upper Plateau <sup>c</sup> |
| Isopropylamine<br>         | 25±2           | No Upper Plateau <sup>c</sup> |
| Butylamine<br>             | —              | —                             |
| L-alaninol<br>             | 25±1           | No Upper Plateau <sup>c</sup> |
| L-alanine methyl ester<br> | 1.90±0.05      | 0.120±0.002                   |
| <i>D-Phe</i><br>           | — <sup>b</sup> | — <sup>b</sup>                |

*S*(+)-2-amino-2-methyl-3-phenylpropionic acid

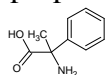

\_\_\_<sup>b</sup>

\_\_\_<sup>b</sup>

---

<sup>a</sup> All responses corrected using the response of H476L as described in text.

<sup>b</sup>  $K_{a-PEP}$  was not responsive to the amino acid analogue within the working concentration defined in Materials and Methods.

<sup>c</sup> Although the amino acid analogue caused a reduction in PEP affinity, within the working concentration range the upper plateau was not obtained.
